# Supplementary material for: Viennese risk prediction score for Advanced Gastroesophageal carcinoma based on Alarm Symptoms (VAGAS score): characterisation of alarm symptoms in advanced gastro-oesophageal cancer and its correlation with outcome
Source: PubMed Central journal article supplement — ESMO Open. 2020 Mar 17;5(2):e000623. doi: 10.1136/esmoopen-2019-000623 (PMC7078766; doi:10.1136/esmoopen-2019-000623), 2020-03-17
Supplement: esmoopen-2019-000623supp005.pdf [file esmoopen-2019-000623supp005.pdf]

**Supplementary 5: Score before adjusting for clinical feasibility**

|                              | <b>coef</b> | <b>Pr(&gt;   z   )</b> |
|------------------------------|-------------|------------------------|
| <b>Bleeding or ulcer</b>     | -0.465      | 0.00838                |
| <b>Stenosis in endoscopy</b> | 0.286       | 0.04895                |
| <b>Dyspepsia</b>             | -0.443      | 0.00112                |
| <b>Weight loss</b>           | 0.442       | 0.00242                |
| <b>Her2</b>                  | -0.384      | 0.10377                |

Concordance Index: 0.6025416
